# Supplementary material for: Real-Time 3D Tracking of Multi-Particle in the Wide-Field Illumination Based on Deep Learning
Source: MDPI journal article supplement (doi:10.3390/s24082583), 2024-04-18
Supplement: s1 [file s1]

## Supporting Information

### Supplementary Notes

#### Supplementary Note 1- Mie scattering theory.

Assuming a light beam polarized in the  $\hat{\epsilon}_0$  direction propagating along the  $\hat{z}$ , with an incident electric field frequency of  $\omega$  and a wavelength of  $\lambda$ . Then, the plane wave equation for the incident light is given by,

$$\mathbf{E}_0(\mathbf{r}, z) = u_0(\mathbf{r})e^{ikz}\hat{\epsilon}_0 \quad (1)$$

Where the wavenumber is  $k = 2\pi n_m/\lambda$ , a medium of refractive index is  $n_m$ . When a light beam is irradiated onto an isotropic small sphere, the expression of the reflected light field is described by,

$$\mathbf{E}_s(\mathbf{r}, z) = E_s(\mathbf{r}, z)\hat{\epsilon}(\mathbf{r}, z) \quad (2)$$

The measured intensity at point  $\mathbf{r}$  in the focal plane is due to the superposition of the incident and scattered waves. Thus, the normalized hologram of an isotropic sphere can be expressed by,

$$b(r) = \frac{|\mathbf{E}_0(\mathbf{r}, 0) + \mathbf{E}_s(\mathbf{r}, 0)|^2}{|u_0(\mathbf{r})|^2} \approx 1 + 2\Re\{E_R(\mathbf{r}, 0)\} + |E_R(\mathbf{r}, 0)|^2 \quad (3)$$

Where the reduced scattered field is  $E_R(\mathbf{r}, 0) = E_s(\mathbf{r}, 0)/u_0(\mathbf{r})$ .

According to the Mie theory, the scattered light field generated by a particle at the focal plane  $\mathbf{r}_p$  can be given by,

$$\mathbf{E}_s(\mathbf{r}) = \mathbf{E}_0 e^{-ikz_p} f_s(k(\mathbf{r} - \mathbf{r}_p)) \quad (4)$$

Then the normalized hologram can be expressed by,

$$b(r) = 1 + 2\Re\left\{e^{-ikz_p} f_s(k(\mathbf{r} - \mathbf{r}_p)) \cdot \hat{x}\right\} + \left|f_s(k(\mathbf{r} - \mathbf{r}_p))\right|^2 \quad (5)$$

Lorenz-Mie theory describes the scattering function as an expansion,

$$f_s(k\mathbf{r}) = \sum_{n=1}^{n_c} \frac{i^n(2n+1)}{n(n+1)} \left( i\alpha_n \mathbf{N}_{e1n}^{(3)}(k\mathbf{r}) - \beta_n \mathbf{M}_{o1n}^{(3)}(k\mathbf{r}) \right) \quad (6)$$

Equation (5), to fit the normalized particle hologram, can obtain the three-dimensional information of the particle. Using the Mie scattering to calculate the three-dimensional information of the small sphere requires calculating many parameters and only obtaining the three-dimensional information of a tiny sphere at a time.

#### Supplementary Note 2- Evaluation Metrics.

##### (1) Horizontal Position Error

The Horizontal Position Error is defined as:

$$XY_{error} = \sqrt{(x_g - x_p)^2 + (y_g - y_p)^2} \quad (7)$$

where  $x_g$  and  $y_g$  is the actual position in x-y plane,  $x_p$  and  $y_p$  is the predicted results.

##### (2) Vertical Position Error

The Vertical Position Error is defined as:

$$Z_{error} = |z_g - z_p| \quad (8)$$

where  $z_g$  is the actual position in the z-axis,  $z_p$  is the predicted results.

#### Supplementary Note 3- Training environment and parameter setting.

The network was trained for 400 epochs on a computer equipped with a GPU A40 (48GB) and a Platinum 8358P CPU @ 2.60GHz, which took approximately four days. Inference on a 4096\*2168 pixels image takes 0.025s (40 FPS) on a computer equipped with a GPU 4090 (24GB) and an i7-11700@2.50GHz CPU, which fully meets real-time requirements.

## Supplementary Figures

### Supplementary Table S1

Tabel S1 Training parameter setting (CenterXFNet-ResNet50)

| Parameters        | Setting        | Help                                               |
|-------------------|----------------|----------------------------------------------------|
| Unfreeze_Epoch    | 350            | Training batches in unfrozen backbone condition    |
| Freeze_Epoch      | 50             | Training batches in frozen backbone condition      |
| Batch_Size        | 8              | Training batch size in unfrozen backbone condition |
| Freeze_Batch_Size | 16             | Training batch size in frozen backbone condition   |
| Optimizer         | Adam           | betas = (0.9, 0.999), weight_decay = 1e-8          |
| PreTrained        | True           | Using pre-trained weights                          |
| Input_Size        | (1024,1024)    | Image size for network input                       |
| Augmentation      | Self-developed | Details can be found in the code and running logs  |
| LR <sup>1</sup>   | Self-developed | Details can be found in the code and running logs  |

<sup>1</sup> It is recommended that the provided weighting parameters be used. It may be necessary to

increase the training batch appropriately in case of different learning rates.

### Supplementary Figure S1

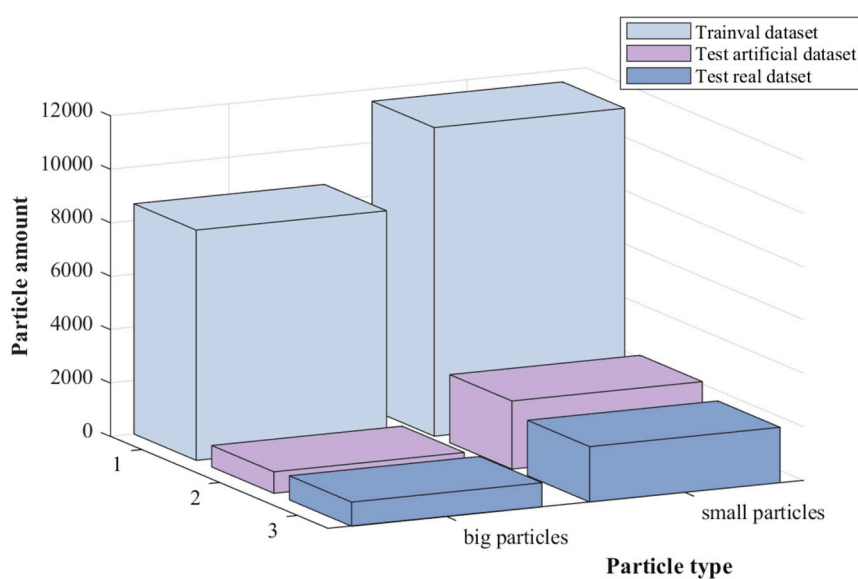

Figure S1 Statistics of the number of particles at different depths in the data set.

### Supplementary Figure S2

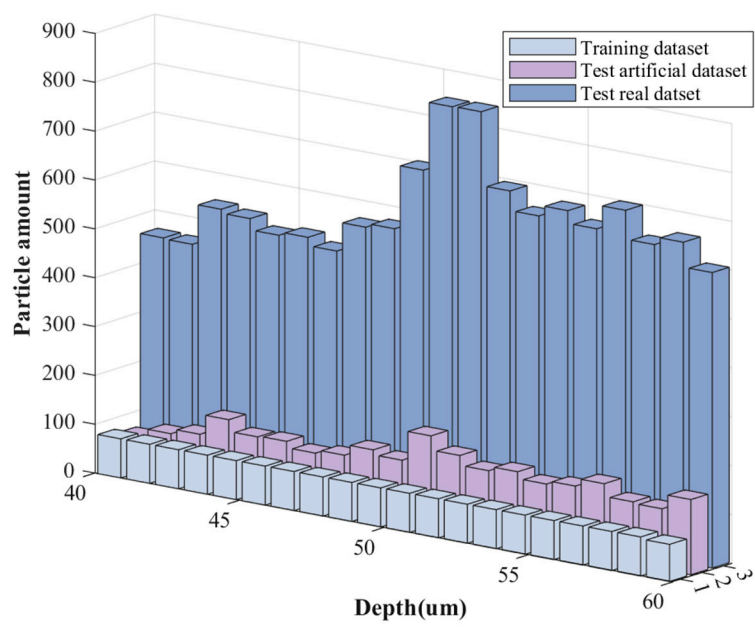

Figure S2 Statistical graph of the number of particles of different sizes in the dataset.

Supplementary Figure S3

(a)

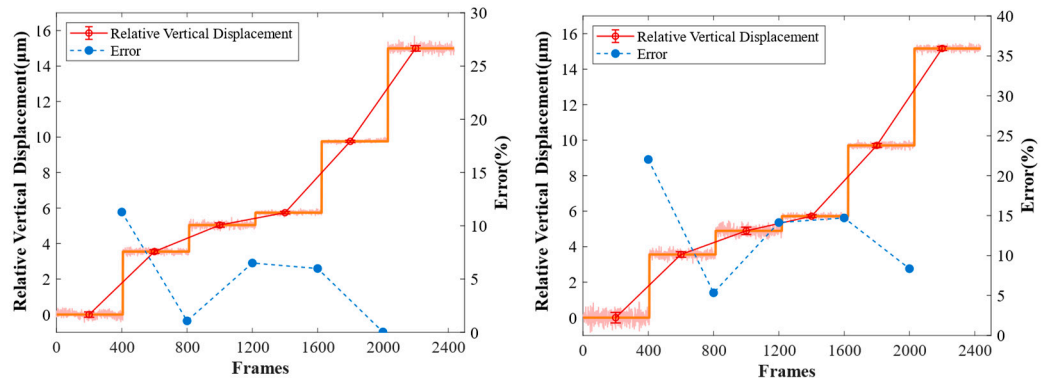

(b)

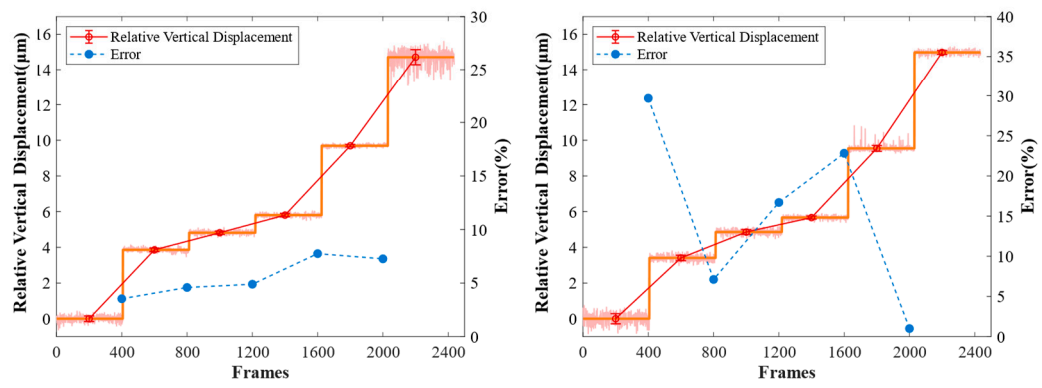

(a)

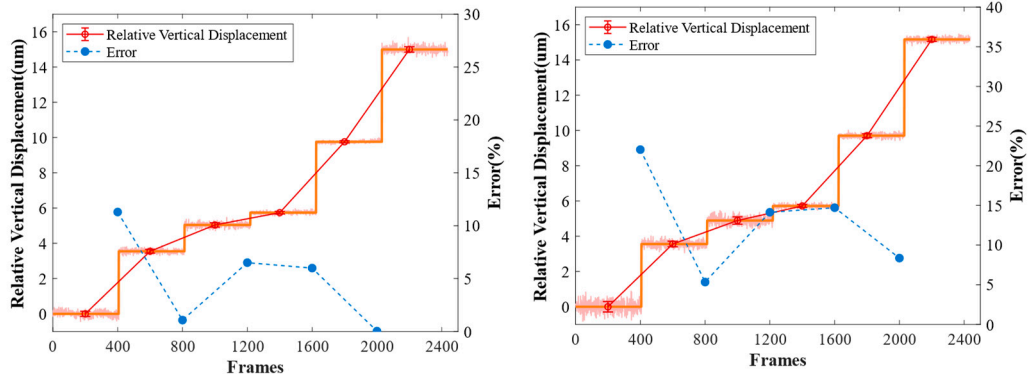

(b)

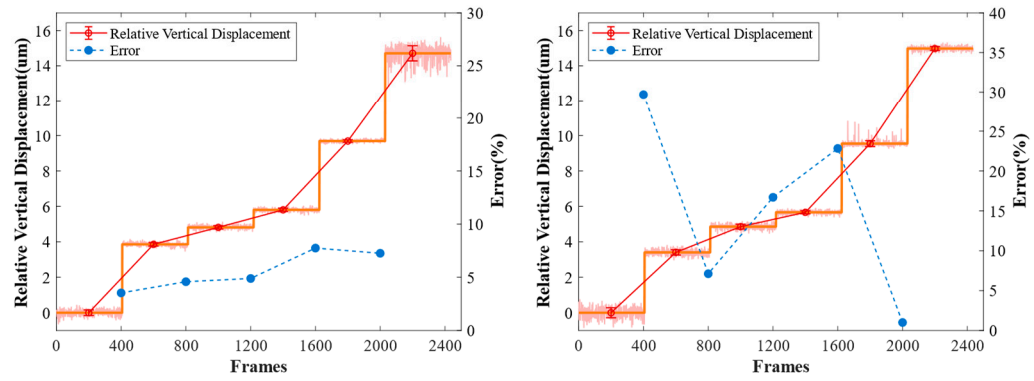

Figure S3 Comparison results of DLA34; (a) Real-time tracking and the tracking data distribution along the z-axis of the big particle and small particle for CenterXFNet-DLA34, respectively. (b) The tracking data distribution of big particles along the z-axis of the big particle and small particle for CenterNet-DLA34, respectively.

Supplementary Figure S4

(a)

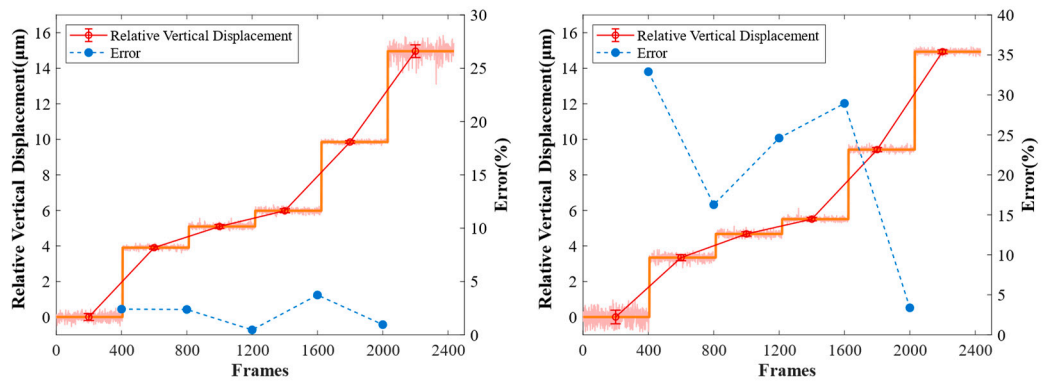

(b)

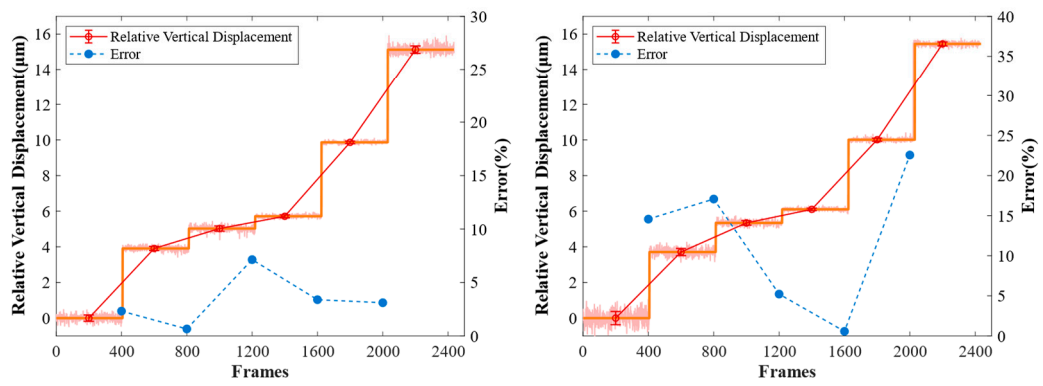

(a)

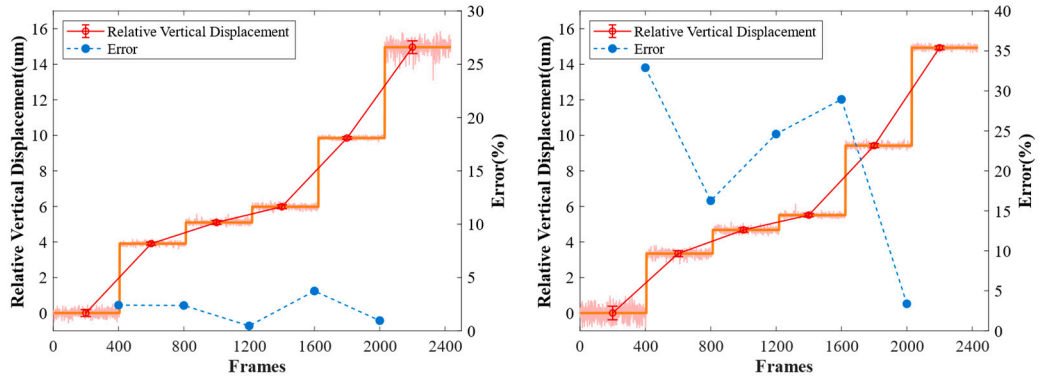

(b)

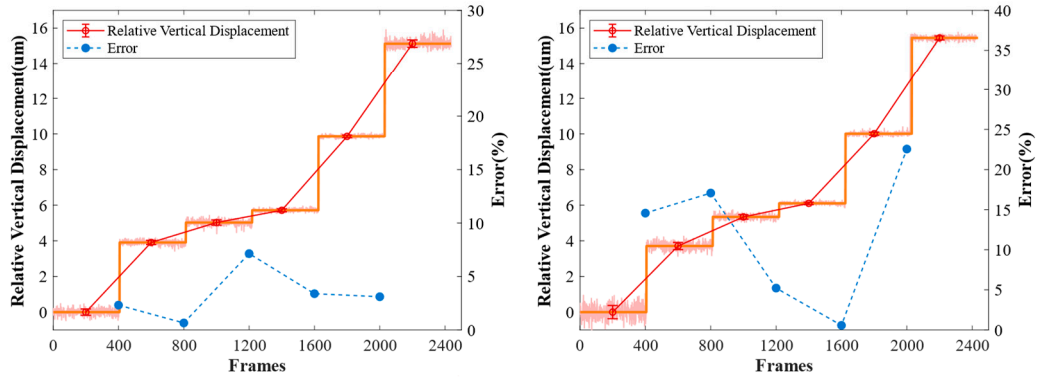

Figure S4 Comparison results of ResNet101 (a) Real-time tracking and the tracking data distribution along the z-axis of the big particle and small particle for CenterXFNet-ResNet101, respectively. (b) The tracking data distribution along the z-axis of the big particle and small particle for CenterNet-ResNet101, respectively.
